# Supplementary material
Source: HighWire-hosted journal article supplement (https://www.qdcxjkg.com/highwire/filestream/114279/field_highwire_adjunct_files/0/ERJ-01121-2014_Supplementarytable.pdf)
Supplement: ERJ-01121-2014_Supplementarytable.pdf [file ERJ-01121-2014_Supplementarytable.pdf]

## African ancestry, lung function and the effect of genetics

Ana Maria B. Menezes, Fernando C. Wehrmeister, Fernando P. Hartwig, Rogelio Perez-Padilla, Denise P. Gigante, Fernando C. Barros, Isabel O. Oliveira, Gustavo D. Ferreira, Bernardo L. Horta.

**Supplementary table S1.** Linear regression coefficients (in litres) for FEV<sub>1</sub> and FVC according to skin color. The 1982 Pelotas Birth Cohort (Brazil).

| African ancestry (%)    | Models*                             |                                      |                                      |                                      |
|-------------------------|-------------------------------------|--------------------------------------|--------------------------------------|--------------------------------------|
|                         | 1                                   | 2                                    | 3                                    | 4                                    |
|                         | $\beta$ (95% CI)                    | $\beta$ (95% CI)                     | $\beta$ (95% CI)                     | $\beta$ (95% CI)                     |
| <i>FEV<sub>1</sub></i>  |                                     |                                      |                                      |                                      |
| <b>Males (N=1045)</b>   | Adj-R <sup>2</sup> = 2.5<br>P<0.001 | Adj-R <sup>2</sup> = 32.2<br>P<0.001 | Adj-R <sup>2</sup> = 33.1<br>P<0.001 | Adj-R <sup>2</sup> = 34.8<br>P=0.005 |
| <b>White</b>            | Reference                           | Reference                            | Reference                            | Reference                            |
| <b>Brown</b>            | -0.25 (-0.42 to -0.08)              | -0.20 (-0.34 to -0.06)               | -0.17 (-0.31 to -0.04)               | -0.15 (-0.29 to -0.01)               |
| <b>Black</b>            | -0.26 (-0.37 to -0.15)              | -0.21 (-0.29 to -0.12)               | -0.17 (-0.26 to -0.07)               | -0.15 (-0.25 to -0.06)               |
| <b>Other</b>            | -0.11 (-0.32 to 0.11)               | -0.07 (-0.25 to 0.11)                | -0.05 (-0.23 to 0.13)                | -0.04 (-0.23 to 0.14)                |
| <b>Females (N=1025)</b> | Adj-R <sup>2</sup> = 4.1<br>P<0.001 | Adj-R <sup>2</sup> = 32.9<br>P<0.001 | Adj-R <sup>2</sup> = 33.8<br>P<0.001 | Adj-R <sup>2</sup> = 36.2<br>P<0.001 |
| <b>White</b>            | Reference                           | Reference                            | Reference                            | Reference                            |
| <b>Brown</b>            | -0.13 (-0.27 to 0.00)               | -0.14 (-0.25 to -0.03)               | -0.13 (-0.24 to -0.01)               | -0.13 (-0.24 to -0.02)               |
| <b>Black</b>            | -0.24 (-0.31 to -0.17)              | -0.23 (-0.29 to -0.17)               | -0.19 (-0.25 to -0.13)               | -0.17 (-0.23 to -0.11)               |
| <b>Other</b>            | -0.15 (-0.30 to 0.00)               | -0.14 (-0.26 to -0.01)               | -0.13 (-0.25 to 0.00)                | -0.11 (-0.24 to 0.01)                |
| <i>FVC</i>              |                                     |                                      |                                      |                                      |
| <b>Males (N=1045)</b>   | Adj-R <sup>2</sup> = 3.3<br>P<0.001 | Adj-R <sup>2</sup> = 38.5<br>P<0.001 | Adj-R <sup>2</sup> = 39.8<br>P<0.001 | Adj-R <sup>2</sup> = 40.7<br>P<0.001 |
| <b>White</b>            | Reference                           | Reference                            | Reference                            | Reference                            |
| <b>Brown</b>            | -0.35 (-0.55 to -0.14)              | -0.28 (-0.44 to -0.12)               | -0.24 (-0.40 to -0.08)               | -0.21 (-0.37 to -0.04)               |
| <b>Black</b>            | -0.35 (-0.48 to -0.23)              | -0.28 (-0.39 to -0.18)               | -0.22 (-0.33 to -0.12)               | -0.19 (-0.30 to -0.09)               |
| <b>Other</b>            | -0.22 (-0.48 to 0.04)               | -0.17 (-0.38 to 0.04)                | -0.15 (-0.36 to 0.06)                | -0.12 (-0.33 to 0.09)                |
| <b>Females (N=1025)</b> | Adj-R <sup>2</sup> = 2.9<br>P<0.001 | Adj-R <sup>2</sup> = 35.4<br>P<0.001 | Adj-R <sup>2</sup> = 36.6<br>P<0.001 | Adj-R <sup>2</sup> = 38.1<br>P<0.001 |
| <b>White</b>            | Reference                           | Reference                            | Reference                            | Reference                            |
| <b>Brown</b>            | -0.08 (-0.24 to 0.07)               | -0.09 (-0.22 to 0.04)                | -0.08 (-0.21 to 0.05)                | -0.10 (-0.23 to 0.03)                |
| <b>Black</b>            | -0.24 (-0.33 to -0.16)              | -0.22 (-0.29 to -0.15)               | -0.18 (-0.25 to -0.11)               | -0.17 (-0.25 to -0.10)               |
| <b>Other</b>            | -0.17 (-0.34 to 0.01)               | -0.15 (-0.29 to -0.01)               | -0.14 (-0.28 to 0.00)                | -0.15 (-0.29 to -0.01)               |

\*1: African ancestry (Crude model); 2: 1 + Height (cm); 3: 2 + Sitting height/height ratio and Chest circumference (cm); 4: 3 + Current asset index (quintiles), Current achieved schooling (categorized), Current smoking, Wheezing (in 2012), Family income at birth (minimum salaries), Maternal education at birth (complete years), Birth weight (g), Gestational age (weeks), Asset index in quintiles (1984), Maternal smoking during pregnancy (number of cigarettes), Wheezing (from birth until 1984), Pneumonia (from birth until 1984).
